# Supplementary material for: Modulation of gastrointestinal digestion of β-lactoglobulin and micellar casein following binding by (−)-epigallocatechin-3-gallate (EGCG) and green tea flavanols
Source: Royal Society of Chemistry journal article supplement (doi:10.1039/d0fo00783h), 2020-01-01
Supplement: d0fo00783h1.pdf [file d0fo00783h1.pdf]

Supplementary Fig. 1

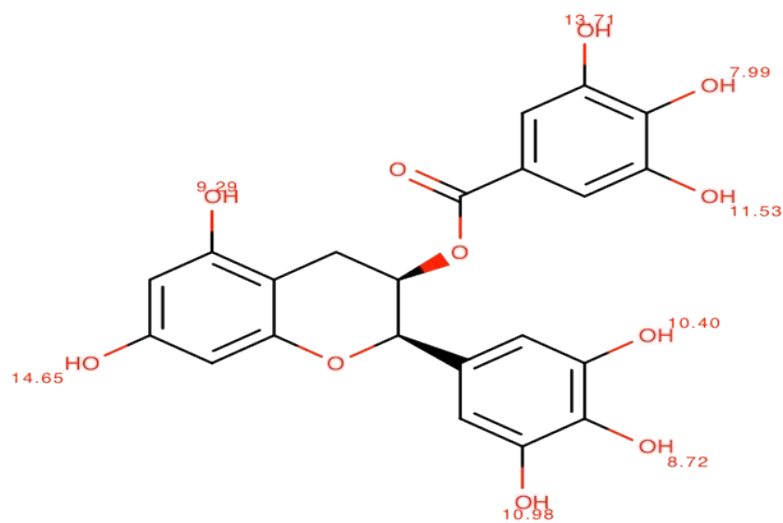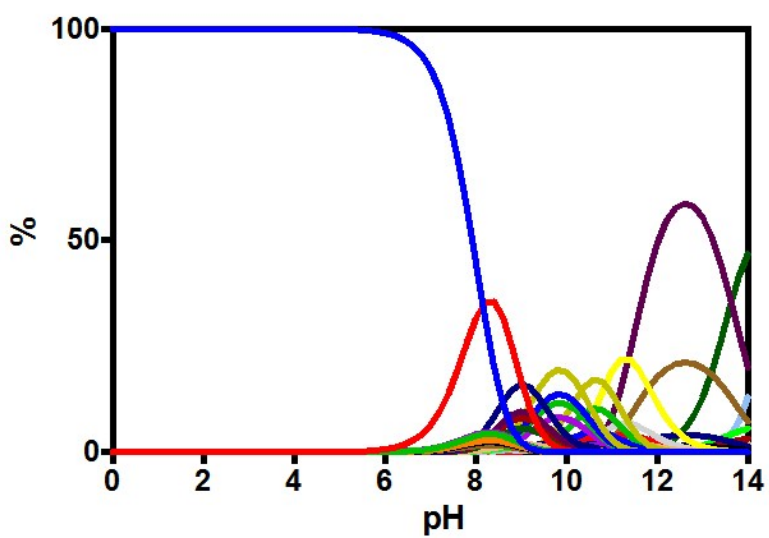

**Supplementary Table 1. Calculated  $pK_a$  values of  $\beta$ -Lg .** The  $pK_a$  values of amino acid residues of  $\beta$ -Lg compared to the predicted values at different pH.

| Residue   | pKa   | pK model |
|-----------|-------|----------|
| ASP 11 A  | 3.81  | 3.80     |
| ASP 28 A  | 2.73  | 3.80     |
| ASP 33 A  | 4.25  | 3.80     |
| ASP 53 A  | 3.80  | 3.80     |
| ASP 64 A  | 3.98  | 3.80     |
| ASP 85 A  | 3.90  | 3.80     |
| ASP 96 A  | 3.87  | 3.80     |
| ASP 98 A  | 2.35  | 3.80     |
| ASP 129 A | 3.41  | 3.80     |
| ASP 130 A | 4.07  | 3.80     |
| ASP 137 A | 3.57  | 3.80     |
| GLU 44 A  | 6.70  | 4.50     |
| GLU 45 A  | 4.58  | 4.50     |
| GLU 51 A  | 4.61  | 4.50     |
| GLU 55 A  | 3.67  | 4.50     |
| GLU 62 A  | 3.76  | 4.50     |
| GLU 65 A  | 4.63  | 4.50     |
| GLU 74 A  | 5.01  | 4.50     |
| GLU 89 A  | 7.79  | 4.50     |
| GLU 108 A | 4.31  | 4.50     |
| GLU 112 A | 4.71  | 4.50     |
| GLU 114 A | 4.95  | 4.50     |
| GLU 127 A | 4.41  | 4.50     |
| GLU 131 A | 4.77  | 4.50     |
| GLU 134 A | 4.34  | 4.50     |
| GLU 157 A | 4.11  | 4.50     |
| GLU 158 A | 4.99  | 4.50     |
| ILE 162 A | 3.44  | 3.20     |
| HIS 146 A | 6.35  | 6.50     |
| HIS 161 A | 4.54  | 6.50     |
| TYR 20 A  | 11.85 | 10.00    |
| TYR 42 A  | 10.80 | 10.00    |
| TYR 99 A  | 10.10 | 10.00    |
| TYR 102 A | 12.62 | 10.00    |
| LYS 8 A   | 10.46 | 10.50    |
| LYS 14 A  | 10.55 | 10.50    |

|           |       |       |
|-----------|-------|-------|
| LYS 47 A  | 11.05 | 10.50 |
| LYS 60 A  | 9.32  | 10.50 |
| LYS 69 A  | 11.10 | 10.50 |
| LYS 70 A  | 10.44 | 10.50 |
| LYS 75 A  | 10.43 | 10.50 |
| LYS 77 A  | 10.44 | 10.50 |
| LYS 83 A  | 10.36 | 10.50 |
| LYS 91 A  | 10.45 | 10.50 |
| LYS 100 A | 11.18 | 10.50 |
| LYS 101 A | 10.71 | 10.50 |
| LYS 135 A | 10.59 | 10.50 |
| LYS 138 A | 10.25 | 10.50 |
| LYS 141 A | 10.36 | 10.50 |
| ARG 40 A  | 12.49 | 12.50 |
| ARG 124 A | 11.35 | 12.50 |
| ARG 148 A | 12.73 | 12.50 |
| N+ 1 A    | 8.32  | 8.00  |

---

$Pk_a$  values were calculated by the Propka method. A:  $\beta$ -Lg A-chain.
